# Supplementary material for: HPV16 synthetic long peptide (HPV16-SLP) vaccination therapy of patients with advanced or recurrent HPV16-induced gynecological carcinoma, a phase II trial
Source: PubMed Central journal article supplement (PMC3623745; doi:10.1186/1479-5876-11-88), 2013-04-04
Supplement: 1479-5876-11-88-S1.pdf [file 1479-5876-11-88-S1.pdf]

**Additional File 1**

**Summary of the HPV16-specific proliferative responses measured by the lymphocyte stimulation assay.**

| ID | pre vaccination |            |      |             |             |            |             | 2-vaccinations |             |             |            |            |             |             | 3 or 4-vaccinations |             |            |            |             |             |             |
|----|-----------------|------------|------|-------------|-------------|------------|-------------|----------------|-------------|-------------|------------|------------|-------------|-------------|---------------------|-------------|------------|------------|-------------|-------------|-------------|
|    | E6.1            | E6.2       | E6.3 | E6.4        | E7.1        | E7.2       | MRM         | E6.1           | E6.2        | E6.3        | E6.4       | E7.1       | E7.2        | MRM         | E6.1                | E6.2        | E6.3       | E6.4       | E7.1        | E7.2        | MRM         |
| 1  | 0,9             | 1,0        | 1,0  | 1,1         | 1,4         | 1,0        | <b>7,5</b>  | 0,7            | 0,7         | 1,3         | 1,0        | 0,7        | 1,2         | 2,3         | 1,2                 | <b>6,0</b>  | <b>7,6</b> | <b>3,0</b> | 0,6         | 1,5         | 2,9         |
| 2  | 0,8             | 1,6        | 1,7  | 1,0         | <b>23,3</b> | <b>5,5</b> | <b>29,3</b> | <b>11,6</b>    | <b>11,4</b> | <b>13,5</b> | <b>7,7</b> | 10,2       | <b>15,2</b> | <b>12,4</b> | <b>8,1</b>          | <b>7,4</b>  | <b>4,4</b> | 2,4        | 3,5         | <b>14,6</b> | 2,3         |
| 3  | 0,3             | 0,3        | 0,3  | 0,3         | 0,2         | 1,2        | <b>7,3</b>  | <b>3,6</b>     | <b>3,5</b>  | 2,3         | <b>6,6</b> | 0,6        | <b>3,9</b>  | <b>4,5</b>  | <b>8,9</b>          | <b>15,7</b> | <b>8,3</b> | <b>4,5</b> | <b>10,2</b> | <b>11,0</b> | <b>16,7</b> |
| 4  | 0,5             | 0,4        | 0,4  | 0,1         | 0,5         | 1,3        | 2,4         | 0,5            | 0,6         | 0,9         | 0,3        | 0,3        | 1,0         | 1,0         |                     |             |            |            |             |             |             |
| 5  | 0,8             | 0,7        | 0,4  | 0,2         | 0,3         | 1,1        | 0,8         |                |             |             |            |            |             |             |                     |             |            |            |             |             |             |
| 6  | 0,3             | 0,3        | 0,2  | 0,1         | 0,1         | 0,3        | 0,3         |                |             |             |            |            |             |             |                     |             |            |            |             |             |             |
| 7  | 0,2             | 0,5        | 0,4  | 0,1         | 0,3         | 1,0        | <b>3,8</b>  |                |             |             |            |            |             |             |                     |             |            |            |             |             |             |
| 8  | 0,3             | 0,5        | 0,2  | 0,2         | 0,2         | 0,7        | 2,9         | 0,5            | 1,3         | 1,3         | 0,9        | 0,2        | 2,5         | 1,2         | 0,9                 | 3,4         | 0,7        | 0,7        | 1,1         | 1,1         | 2,9         |
| 9  | 0,5             | 0,5        | 0,5  | 0,4         | 0,8         | 0,8        | 1,0         | 0,2            | 0,3         | 0,3         | 0,8        | 0,3        | 0,4         | 0,6         | 1,1                 | <b>3,0</b>  | <b>4,5</b> | <b>4,7</b> | 1,0         | 1,4         | 1,2         |
| 10 | 1,1             | <b>3,0</b> | 1,1  | 1,5         | 1,1         | <b>3,9</b> | <b>15,5</b> | 0,5            | 1,2         | 1,5         | 0,5        | 2,3        | <b>4,7</b>  | <b>4,7</b>  | 1,3                 | <b>3,0</b>  | <b>5,4</b> | 3,3        | 2,4         | <b>7,2</b>  | <b>8,8</b>  |
| 11 | 0,6             | 0,7        | 0,7  | 0,1         | 0,7         | 0,6        | 0,4         |                |             |             |            |            |             |             | 0,6                 | 1,6         | 1,2        | 0,2        | 0,4         | 0,9         | 0,2         |
| 12 | 0,7             | 1,5        | 1,0  | 0,1         | 0,4         | 1,4        | 1,4         | 0,4            | 1,0         | 2,0         | 0,2        | 0,2        | 1,1         | 1,3         |                     |             |            |            |             |             |             |
| 13 | 0,9             | 2,2        | 1,0  | 0,6         | 0,8         | 2,5        | 2,0         | 0,2            | 0,5         | 0,1         | 0,1        | 0,1        | 0,7         | 0,4         | 1,4                 | 2,0         | 1,1        | 1,5        | 1,6         | 3,3         | <b>3,4</b>  |
| 14 | 0,5             | 0,6        | 0,6  | 0,0         | 0,4         | 0,7        | 1,2         | 0,9            | 1,0         | <b>4,1</b>  | 0,2        | 0,2        | <b>3,9</b>  | 0,6         |                     |             |            |            |             |             |             |
| 15 | 0,4             | 0,7        | 0,3  | 0,2         | 0,4         | 0,6        | <b>3,8</b>  | 0,9            | 1,5         | 1,1         | 0,3        | 0,6        | 1,6         | 1,1         |                     |             |            |            |             |             |             |
| 16 | <b>5,1</b>      | 1,7        | 0,5  | <b>10,5</b> | 1,0         | 1,4        | <b>57,8</b> |                |             |             |            |            |             |             |                     |             |            |            |             |             |             |
| 17 | 0,3             | 0,5        | 0,3  | 0,1         | 0,3         | 0,6        | 2,5         | 0,7            | 1,0         | 0,3         | 0,1        | 0,2        | 0,9         | 1,7         | 0,3                 | 0,9         | 0,4        | 1,9        | 0,2         | 0,7         | 2,0         |
| 18 |                 |            |      |             |             |            |             |                |             |             |            |            |             |             |                     |             |            |            |             |             |             |
| 19 | 0,7             | 0,9        | 0,3  | 0,5         | 0,9         | 0,6        | 3,1         | <b>6,4</b>     | <b>7,6</b>  | <b>6,9</b>  | <b>4,2</b> | <b>5,9</b> | <b>5,8</b>  | <b>5,0</b>  | <b>5,3</b>          | <b>4,6</b>  | 2,2        | <b>4,9</b> | <b>8,7</b>  | <b>6,6</b>  | 2,4         |
| 20 | 0,7             | 1,1        | 0,6  | 0,3         | 0,5         | 1,0        | <b>4,3</b>  | 2,8            | <b>5,9</b>  | 2,8         | 2,7        | 0,6        | 2,3         | <b>4,1</b>  | 1,4                 | 1,1         | 1,1        | 1,1        | 1,3         | 1,6         | 2,4         |
| 21 | 0,1             | 0,4        | 0,1  | 0,1         | 0,1         | 0,8        | <b>4,8</b>  | 2,8            | <b>4,1</b>  | 2,9         | 1,3        | 3,8        | <b>4,8</b>  | <b>13,6</b> | 0,6                 | 1,5         | 0,4        | 0,4        | 0,4         | 1,7         | 3,1         |

Indicated is the stimulation index (SI), which was calculated by dividing the mean of tested wells by the mean of the medium control. Indicated in bold are positive proliferative responses defined as a SI of  $\geq 3$  provided that the counts of  $\geq 6$  out of 8-wells were above the cut-off value (mean plus 3 times standard deviation (STD) of the 8 medium control wells). Fields left open indicate that there was no PBMC sample that could be tested at that time point.
