# Supplementary material for: HPV16 synthetic long peptide (HPV16-SLP) vaccination therapy of patients with advanced or recurrent HPV16-induced gynecological carcinoma, a phase II trial
Source: PubMed Central journal article supplement (PMC3623745; doi:10.1186/1479-5876-11-88), 2013-04-04
Supplement: 1479-5876-11-88-S3.pdf [file 1479-5876-11-88-S3.pdf]

**Additional File 3**

**Summary of the HPV16-specific T-cell frequency measured by IFN $\gamma$ -ELISPOT.**

| ID | pre vaccination |      |      |      |      |      |     | 2 vaccinations |      |      |      |      |      |     | 3 or 4 vaccinations |      |      |      |      |      |     |
|----|-----------------|------|------|------|------|------|-----|----------------|------|------|------|------|------|-----|---------------------|------|------|------|------|------|-----|
|    | E6.1            | E6.2 | E6.3 | E6.4 | E7.1 | E7.2 | MRM | E6.1           | E6.2 | E6.3 | E6.4 | E7.1 | E7.2 | MRM | E6.1                | E6.2 | E6.3 | E6.4 | E7.1 | E7.2 | MRM |
| 1  | 0               | 0    | 0    | 0    | 0    | 0    | 11  | 13             | 52   | 32   | 0    | 15   | 3    | 50  | 21                  | 86   | 94   | 8    | 4    | 21   | 76  |
| 2  | 0               | 0    | 5    | 0    | 168  | 78   | 163 | 32             | 6    | 6    | 0    | 4    | 46   | 169 | 60                  | 33   | 25   | 7    | 37   | 126  | 172 |
| 3  | 0               | 0    | 4    | 40   | 0    | 0    | 15  | 23             | 145  | 54   | 93   | 0    | 0    | 38  | 213                 | 166  | 79   | 102  | 23   | 65   | 147 |
| 4  |                 |      |      |      |      |      |     | 65             | 78   | 31   | 0    | 0    | 27   | 9   |                     |      |      |      |      |      |     |
| 5  |                 |      |      |      |      |      |     |                |      |      |      |      |      |     |                     |      |      |      |      |      |     |
| 6  |                 |      |      |      |      |      |     |                |      |      |      |      |      |     |                     |      |      |      |      |      |     |
| 7  |                 |      |      |      |      |      |     |                |      |      |      |      |      |     |                     |      |      |      |      |      |     |
| 8  | 0               | 8    | 0    | 8    | 0    | 12   | 0   | 18             | 141  | 28   | 17   | 27   | 170  | 2   | 3                   | 3    | 0    | 0    | 4    | 8    | 0   |
| 9  |                 |      |      |      |      |      |     |                |      |      |      |      |      |     | 8                   | 17   | 23   | 52   | 0    | 0    | 0   |
| 10 | 0               | 0    | 0    | 0    | 1    | 0    | 8   | 0              | 8    | 28   | 0    | 7    | 16   | 9   | 0                   | 5    | 4    | 3    | 5    | 5    | 3   |
| 11 |                 |      |      |      |      |      |     | 0              | 0    | 0    | 0    | 0    | 0    | 0   | 0                   | 4    | 20   | 0    | 0    | 3    | 0   |
| 12 | 0               | 3    | 12   | 5    | 2    | 4    | 17  | 18             | 82   | 40   | 13   | 9    | 9    | 14  |                     |      |      |      |      |      |     |
| 13 | 0               | 0    | 2    | 0    | 2    | 2    | 4   | 0              | 2    | 0    | 0    | 0    | 6    | 0   | 0                   | 5    | 0    | 0    | 0    | 0    | 0   |
| 14 | 0               | 0    | 0    | 0    | 0    | 3    | 0   | 0              | 5    | 0    | 0    | 0    | 0    | 0   |                     |      |      |      |      |      |     |
| 15 | 0               | 0    | 0    | 0    | 0    | 8    | 19  | 17             | 126  | 277  | 0    | 0    | 14   | 0   |                     |      |      |      |      |      |     |
| 16 |                 |      |      |      |      |      |     |                |      |      |      |      |      |     |                     |      |      |      |      |      |     |
| 17 | 0               | 0    | 0    | 0    | 0    | 3    | 19  | 7              | 72   | 2    | 0    | 39   | 63   | 2   | 0                   | 0    | 0    | 0    | 0    | 0    | 19  |
| 18 |                 |      |      |      |      |      |     |                |      |      |      |      |      |     |                     |      |      |      |      |      |     |
| 19 | 0               | 0    | 0    | 0    | 60   | 0    | 16  | 131            | 205  | 197  | 82   | 118  | 192  | 11  | 190                 | 286  | 296  | 12   | 114  | 354  | 3   |
| 20 | 0               | 2    | 0    | 1    | 0    | 0    | 3   | 128            | 246  | 37   | 57   | 0    | 66   | 0   |                     |      |      |      |      |      |     |
| 21 | 0               | 5    | 0    | 0    | 0    | 0    | 194 | 0              | 180  | 0    | 0    | 0    | 13   | 105 | 0                   | 132  | 0    | 0    | 0    | 23   | 181 |

Indicated is the number of specific spots per 100,000 PBMC, which were calculated by subtracting the mean number of spots + 2xSTD of the medium only control from the mean number of spots in experimental wells. Antigen-specific T-cell frequencies were considered to be increased compared to non-responders when specific T-cell frequencies were above 1/10,000 and are indicated in bold. Fields left open indicate that there was no PBMC sample that could be tested at that time point.
