# Supplementary material for: HPV16 synthetic long peptide (HPV16-SLP) vaccination therapy of patients with advanced or recurrent HPV16-induced gynecological carcinoma, a phase II trial
Source: PubMed Central journal article supplement (PMC3623745; doi:10.1186/1479-5876-11-88), 2013-04-04
Supplement: 1479-5876-11-88-S4.pdf [file 1479-5876-11-88-S4.pdf]

**Additional File 4**

**Strength of immune response versus the median survival of all vaccinated patients.**

|                               | Survival ≤ 12.6 months            |       |       | Survival > 12.6 months            |       |       |       |
|-------------------------------|-----------------------------------|-------|-------|-----------------------------------|-------|-------|-------|
|                               | pre-vac                           | 2-vac | 4-vac | pre-vac                           | 2-vac | 4-vac |       |
| <b>ELISPOT</b>                | n=5                               | n=5   | n=3   | n=8                               | n=8   | n=6   |       |
| Average                       | 0,7                               | 25,2  | 21,9  | Average                           | 8,7   | 55,8  | 61,9  |
| STD                           | 1,7                               | 61,8  | 39,5  | STD                               | 27,8  | 65,1  | 96,1  |
| Median                        | 0,0                               | 0,0   | 2,0   | Median                            | 0,0   | 28,0  | 7,5   |
| IQR25                         | 0,0                               | 0,0   | 0,0   | IQR25                             | 0,0   | 7,4   | 2,3   |
| IQR75                         | 0,0                               | 13,8  | 21,0  | IQR75                             | 3,3   | 81,6  | 84,8  |
|                               | <i>in spots per 100.000 cells</i> |       |       | <i>in spots per 100.000 cells</i> |       |       |       |
| <b>LST</b>                    | n=7                               | n=6   | n=4   | n=9                               | n=9   | n=8   |       |
| Average                       | 0,7                               | 1,3   | 1,7   | Average                           | 1,3   | 3,2   | 3,9   |
| STD                           | 0,5                               | 1,3   | 1,8   | STD                               | 3,2   | 3,7   | 3,7   |
| Median                        | 0,6                               | 0,9   | 1,3   | Median                            | 0,6   | 1,4   | 2,7   |
| IQR25                         | 0,4                               | 0,4   | 0,6   | IQR25                             | 0,3   | 0,5   | 1,1   |
| IQR75                         | 0,9                               | 1,4   | 1,6   | IQR75                             | 1,1   | 4,6   | 5,3   |
|                               | <i>in stimulation index</i>       |       |       | <i>in stimulation index</i>       |       |       |       |
| <b>IFN<math>\gamma</math></b> | n=7                               | n=6   | n=4   | n=9                               | n=9   | n=8   |       |
| Average                       | 17,9                              | 99,3  | 183,2 | Average                           | 131,8 | 328,0 | 424,0 |
| STD                           | 32,7                              | 214,0 | 536,2 | STD                               | 674,6 | 620,0 | 869,1 |
| Median                        | 0,0                               | 2,2   | 3,1   | Median                            | 0,9   | 20,7  | 27,2  |
| IQR25                         | 0,0                               | 0,0   | 0,0   | IQR25                             | 0,0   | 3,5   | 3,4   |
| IQR75                         | 22,5                              | 27,6  | 54,7  | IQR75                             | 13,2  | 361,5 | 261,7 |
|                               | <i>in pg/ml</i>                   |       |       | <i>in pg/ml</i>                   |       |       |       |
| <b>IL-5</b>                   | n=7                               | n=6   | n=4   | n=9                               | n=9   | n=8   |       |
| Average                       | 1,0                               | 34,4  | 42,7  | Average                           | 3,0   | 59,5  | 143,5 |
| STD                           | 4,6                               | 132,3 | 133,3 | STD                               | 16,0  | 116,9 | 314,8 |
| Median                        | 0,0                               | 1,3   | 4,7   | Median                            | 0,0   | 5,2   | 32,5  |
| IQR25                         | 0,0                               | 0,1   | 0,3   | IQR25                             | 0,0   | 1,4   | 2,7   |
| IQR75                         | 0,3                               | 18,3  | 27,6  | IQR75                             | 0,7   | 49,7  | 127,9 |
|                               | <i>in pg/ml</i>                   |       |       | <i>in pg/ml</i>                   |       |       |       |
| <b>TNF<math>\alpha</math></b> | n=7                               | n=6   | n=4   | n=9                               | n=9   | n=8   |       |
| Average                       | 0,4                               | 1,6   | 1,6   | Average                           | 2,1   | 17,4  | 29,7  |
| STD                           | 0,6                               | 3,3   | 4,5   | STD                               | 9,2   | 68,6  | 121,5 |
| Median                        | 0,1                               | 0,1   | 0,1   | Median                            | 0,0   | 2,1   | 2,4   |
| IQR25                         | 0,0                               | 0,0   | 0,0   | IQR25                             | 0,0   | 0,2   | 0,4   |
| IQR75                         | 0,7                               | 1,7   | 1,1   | IQR75                             | 0,1   | 6,2   | 7,2   |
|                               | <i>in pg/ml</i>                   |       |       | <i>in pg/ml</i>                   |       |       |       |
| <b>IL-10</b>                  | n=7                               | n=6   | n=4   | n=9                               | n=9   | n=8   |       |
| Average                       | 0,5                               | 11,9  | 13,5  | Average                           | 3,7   | 18,9  | 28,8  |
| STD                           | 0,8                               | 24,4  | 27,6  | STD                               | 11,3  | 28,6  | 44,3  |
| Median                        | 0,0                               | 3,3   | 1,3   | Median                            | 0,0   | 8,9   | 12,9  |
| IQR25                         | 0,0                               | 0,0   | 0,0   | IQR25                             | 0,0   | 0,6   | 0,0   |
| IQR75                         | 0,8                               | 13,7  | 13,2  | IQR75                             | 0,9   | 23,3  | 36,5  |
|                               | <i>in pg/ml</i>                   |       |       | <i>in pg/ml</i>                   |       |       |       |

For each assay and time point the number of patients tested and included are indicated. The average, standard deviation (STD), median and the interquartile range with the 25% percentile (IQR25) and 75% percentile (IQR75) are provided.
