# Supplementary material for: HPV16 synthetic long peptide (HPV16-SLP) vaccination therapy of patients with advanced or recurrent HPV16-induced gynecological carcinoma, a phase II trial
Source: PubMed Central journal article supplement (PMC3623745; doi:10.1186/1479-5876-11-88), 2013-04-04
Supplement: 1479-5876-11-88-S5.pdf [file 1479-5876-11-88-S5.pdf]

**Additional File 5**

**Strength of immune response versus the median survival of vaccinated cervical cancer patients.**

|                               | Survival ≤ 8.8 months       |       |       | Survival > 8.8 months       |       |       |       |
|-------------------------------|-----------------------------|-------|-------|-----------------------------|-------|-------|-------|
|                               | pre-vac                     | 2-vac | 4-vac | pre-vac                     | 2-vac | 4-vac |       |
| <b>LST</b>                    | n=5                         | n=4   | n=2   | n=8                         | n=8   | n=6   |       |
| Average                       | 0,7                         | 0,9   | 1,3   | Average                     | 1,3   | 3,4   | 4,1   |
| STD                           | 0,5                         | 1,1   | 0,8   | STD                         | 3,3   | 3,8   | 4,0   |
| Median                        | 0,6                         | 0,6   | 1,3   | Median                      | 0,7   | 1,6   | 2,3   |
| IQR25                         | 0,4                         | 0,3   | 0,8   | IQR25                       | 0,3   | 0,7   | 1,1   |
| IQR75                         | 0,7                         | 1,0   | 1,6   | IQR75                       | 1,0   | 5,8   | 6,5   |
|                               | <i>in stimulation index</i> |       |       | <i>in stimulation index</i> |       |       |       |
| <b>IFN<math>\gamma</math></b> | n=5                         | n=4   | n=2   | n=8                         | n=8   | n=6   |       |
| Average                       | 7,2                         | 109,1 | 4,6   | Average                     | 152,5 | 378,0 | 585,0 |
| STD                           | 14,5                        | 237,2 | 8,1   | STD                         | 713,8 | 646,1 | 952,1 |
| Median                        | 0,0                         | 1,8   | 1,6   | Median                      | 1,1   | 52,3  | 137,4 |
| IQR25                         | 0,0                         | 0,0   | 0,0   | IQR25                       | 0,0   | 4,0   | 14,4  |
| IQR75                         | 2,0                         | 26,3  | 4,4   | IQR75                       | 30,8  | 511,7 | 846,6 |
|                               | <i>in pg/ml</i>             |       |       | <i>in pg/ml</i>             |       |       |       |
| <b>IL-5</b>                   | n=5                         | n=4   | n=2   | n=8                         | n=8   | n=6   |       |
| Average                       | 0,3                         | 7,9   | 11,4  | Average                     | 3,4   | 66,0  | 163,9 |
| STD                           | 0,6                         | 11,3  | 20,0  | STD                         | 17,0  | 122,5 | 332,0 |
| Median                        | 0,0                         | 0,4   | 0,3   | Median                      | 0,0   | 4,7   | 40,9  |
| IQR25                         | 0,0                         | 0,1   | 0,2   | IQR25                       | 0,0   | 1,4   | 3,4   |
| IQR75                         | 0,2                         | 18,3  | 11,3  | IQR75                       | 0,5   | 70,4  | 133,3 |
|                               | <i>in pg/ml</i>             |       |       | <i>in pg/ml</i>             |       |       |       |

For each assay and time point the number of patients tested and included are indicated. The average, standard deviation (SD), median and the interquartile range with the 25% percentile (IQR25) and 75% percentile (IQR75) are provided.
