# Supplementary material for: HPV16 synthetic long peptide (HPV16-SLP) vaccination therapy of patients with advanced or recurrent HPV16-induced gynecological carcinoma, a phase II trial
Source: PubMed Central journal article supplement (PMC3623745; doi:10.1186/1479-5876-11-88), 2013-04-04
Supplement: 1479-5876-11-88-S6.pdf [file 1479-5876-11-88-S6.pdf]

## Additional File 6

### Comparison of vaccinated patients with a matched cohort

|                                                 | Vaccine group (n=16) | Mean ± SD (range) | Matched cohort (n=16) | Mean ± SD (range) | Independent Sample T-test for equality of means (p= ; 95% CI) | Significance (p=) |
|-------------------------------------------------|----------------------|-------------------|-----------------------|-------------------|---------------------------------------------------------------|-------------------|
| <b>FIGO</b>                                     |                      |                   |                       |                   |                                                               |                   |
| 1B1                                             | 6 (37.5%)            |                   | 6 (37.5%)             |                   |                                                               | 1.0*              |
| 1B2                                             | 1 (6.2%)             |                   | 1 (6.2%)              |                   |                                                               |                   |
| 2A                                              | 2 (12.5%)            |                   | 2 (12.5%)             |                   |                                                               |                   |
| 2B                                              | 3 (18.8%)            |                   | 3 (18.8%)             |                   |                                                               |                   |
| 3B                                              | 2 (12.5%)            |                   | 2 (12.5%)             |                   |                                                               |                   |
| 4                                               | 2 (12.5%)            |                   | 2 (12.5%)             |                   |                                                               |                   |
| <b>Interval diagnosis - recurrence (months)</b> |                      | 15.06 ± 12.2      |                       | 14.25 ± 9.2       | 0.83 95% CI (-8.60 - 6.98)                                    | 0.833***          |
| <b>Primary Therapy</b>                          |                      |                   |                       |                   |                                                               |                   |
| None                                            | 1 (6.2%)             |                   | 0                     |                   |                                                               | 0.182*            |
| Surgery                                         | 7 (43.8%)            |                   | 10 (62.5%)            |                   |                                                               |                   |
| CHRT                                            | 8 (50%)              |                   | 4 (25%)               |                   |                                                               |                   |
| RT                                              | 0                    |                   | 2 (12.5%)             |                   |                                                               |                   |
| <b>Recurrence Therapy</b>                       |                      |                   |                       |                   |                                                               |                   |
| Vaccination (Vac)                               | 10 (62.5%)           |                   | 0                     |                   |                                                               | <b>0.002*</b>     |
| CH + Vac                                        | 2 (12.5%)            |                   | 0                     |                   |                                                               |                   |
| Vac + CH + RT                                   | 1 (6.2%)             |                   | 0                     |                   |                                                               |                   |
| Vac + RT                                        | 1 (6.2%)             |                   | 0                     |                   |                                                               |                   |
| CH + Vac + CH                                   | 1 (6.2%)             |                   | 0                     |                   |                                                               |                   |
| SUR + Vac                                       | 1 (6.2%)             |                   | 0                     |                   |                                                               |                   |
| CH                                              | 0                    |                   | 5 (31.2%)             |                   |                                                               |                   |
| CHRT                                            | 0                    |                   | 2 (12.5%)             |                   |                                                               |                   |
| SUR                                             | 0                    |                   | 1 (6.2%)              |                   |                                                               |                   |
| SUR + CH                                        | 0                    |                   | 1 (6.2%)              |                   |                                                               |                   |
| SUR + CHRT                                      | 0                    |                   | 1 (6.2%)              |                   |                                                               |                   |
| SUR + RT                                        | 0                    |                   | 1 (6.2%)              |                   |                                                               |                   |
| RT                                              | 0                    |                   | 1 (6.2%)              |                   |                                                               |                   |
| None                                            | 0                    |                   | 4 (25%)               |                   |                                                               |                   |
| <b>Age diagnosis (years)</b>                    | -                    | 42.88 ± 9.6       | -                     | 40.19 ± 7,7       | 0.39 95% CI (-8.99 - 3.61)                                    | 0.391***          |
| <b>Age recurrence (years)</b>                   | -                    | 44.25 ± 9.57      | -                     | 41.56 ± 7.4       | 0.38 95% CI (-8.87 - 3.49)                                    | 0.382***          |
| <b>Recurrence</b>                               |                      |                   |                       |                   |                                                               |                   |
| Endstage                                        | 1 (6.2%)             |                   | 1 (6.2%)              |                   |                                                               | <b>0.014*</b>     |
| LR                                              | 4 (25%)              |                   | 12 (75%)              |                   |                                                               |                   |
| Distance                                        | 11 (68.8%)           |                   | 3 (18.8%)             |                   |                                                               |                   |
| <b>Primary Chemotherapy</b>                     |                      |                   |                       |                   |                                                               |                   |
| None                                            | 5 (31.2%)            |                   | 11 (68.8%)            |                   |                                                               | 0.060*            |
| Unknown                                         | 1 (6.2%)             |                   | 2 (12.5%)             |                   |                                                               |                   |
| Cisplatin                                       | 9 (56.2%)            |                   | 2 (12.5%)             |                   |                                                               |                   |
| Carboplatin/Taxol                               | 0                    |                   | 1 (6.2%)              |                   |                                                               |                   |
| Carboplatin/Cisplatin                           | 1 (6.2%)             |                   | 0                     |                   |                                                               |                   |
| <b>Recurrence Chemotherapy</b>                  |                      |                   |                       |                   |                                                               |                   |
| none                                            | 13 (81.2%)           |                   | 7 (43.8%)             |                   |                                                               | 0.081*            |
| Cisplatin                                       | 0                    |                   | 2 (12.5%)             |                   |                                                               |                   |
| Cisplatin/Topotecan                             | 1 (6.2%)             |                   | 0                     |                   |                                                               |                   |
| Carboplatin/Taxol                               | 2 (12.5%)            |                   | 2 (12.5%)             |                   |                                                               |                   |
| Cisplatin/Taxol                                 | 0                    |                   | 1 (6.2%)              |                   |                                                               |                   |
| Unknown                                         | 0                    |                   | 4 (25%)               |                   |                                                               |                   |
| <b>Adjuvant Therapy</b>                         |                      |                   |                       |                   |                                                               |                   |
| None                                            | 8 (50%)              |                   | 6 (37.5%)             |                   |                                                               | 0.054*            |
| RT                                              | 2 (12.5%)            |                   | 6 (37.5%)             |                   |                                                               |                   |
| CHRT                                            | 3 (18.8%)            |                   | 1 (6.2%)              |                   |                                                               |                   |
| SUR                                             | 3 (18.8%)            |                   | 0                     |                   |                                                               |                   |
| HT                                              | 0                    |                   | 3 (18.8%)             |                   |                                                               |                   |
| <b>Survival after recurrence (months)</b>       |                      | 12.81 ± 9.4       |                       | 11.44 ± 7.7       | 0.65 95% CI (-7.55 - 4.80)                                    | 0.587**           |
| <b>Dead (number of patients)</b>                | 15 ((83.8%)          |                   | 15 ((83.8%)           |                   |                                                               | 1.0*              |

Indicated p-values were generated via the Mann-Whitney non-parametric independent t-test, by Chi-Square test when indicated with a (\*), by Wilcoxon Signed Rank test (\*\*\*) or by parametric T-test (\*\*).
